# Supplementary material for: Variation in attitudes toward diagnosis and medication of ADHD: a survey among clinicians in the Norwegian child and adolescent mental health services
Source: PubMed Central journal article supplement (PMC10682209; doi:10.1007/s00787-022-02110-7), 2022-11-19
Supplement: 787_2022_2110_MOESM2_ESM.pdf [file 787_2022_2110_MOESM2_ESM.pdf]

## Appendix B. SEM model output with unstandardized and standardized parameter estimates

### SEM model, unstandardized parameters

```
sem (DA -> D1 D2 D3 D4 D5 D6 D7) ///
(MA -> M1 M3 M5 M6 M7 M8 M9), ///
covstruct(_lexogenous, diagonal) method(mlmv) latent(DA MA ) ///
cov( DA@1 DA*MA e.D1*e.D2 e.D1*e.D3 e.D6*e.D7 ///
MA@1 e.M3*e.M5) means( DA@0 MA@0) nocapslatent
```

Endogenous variables

Measurement: D1 D2 D3 D4 D5 D6 D7 M1 M3 M5 M6 M7 M8 M9

Exogenous variables

Latent: DA MA

Fitting saturated model:

```
Iteration 0: log likelihood = -9003.3706
Iteration 1: log likelihood = -8997.7694
Iteration 2: log likelihood = -8997.6553
Iteration 3: log likelihood = -8997.6552
```

Fitting baseline model:

```
Iteration 0: log likelihood = -10330.968
Iteration 1: log likelihood = -10330.943
Iteration 2: log likelihood = -10330.943
```

Fitting target model:

```
Iteration 0: log likelihood = -9400.7225 (not concave)
Iteration 1: log likelihood = -9245.5222 (not concave)
Iteration 2: log likelihood = -9156.9711
Iteration 3: log likelihood = -9105.7863
Iteration 4: log likelihood = -9092.2796
Iteration 5: log likelihood = -9092.0466
Iteration 6: log likelihood = -9092.0465
```

Structural equation model

Number of obs = 674

Estimation method: mlmv

Log likelihood = -9092.0465

```
( 1) [ ]var(DA) = 1
( 2) [ ]var(MA) = 1
```

|             |       | OIM         |           |       |       |          | [95% conf. interval] |  |
|-------------|-------|-------------|-----------|-------|-------|----------|----------------------|--|
|             |       | Coefficient | std. err. | z     | P> z  |          |                      |  |
| Measurement |       | -----       |           |       |       |          |                      |  |
| D1          | DA    | .3486842    | .024949   | 13.98 | 0.000 | .299785  | .3975834             |  |
|             | _cons | .9244126    | .0243675  | 37.94 | 0.000 | .8766532 | .972172              |  |
| D2          |       | -----       |           |       |       |          |                      |  |
|             | DA    | .3888214    | .0253654  | 15.33 | 0.000 | .339106  | .4385367             |  |
|             | _cons | .8137719    | .0252892  | 32.18 | 0.000 | .764206  | .8633377             |  |
| D3          |       | -----       |           |       |       |          |                      |  |
|             | DA    | .3941736    | .0267853  | 14.72 | 0.000 | .3416754 | .4466718             |  |
|             | _cons | 1.528536    | .0265495  | 57.57 | 0.000 | 1.4765   | 1.580572             |  |

|    |                |          |               |       |       |          |          |
|----|----------------|----------|---------------|-------|-------|----------|----------|
| D4 | DA             | .5187783 | .0271534      | 19.11 | 0.000 | .4655586 | .5719981 |
|    | _cons          | 1.397599 | .0286939      | 48.71 | 0.000 | 1.34136  | 1.453838 |
| D5 | DA             | .5655215 | .0250344      | 22.59 | 0.000 | .5164549 | .6145881 |
|    | _cons          | 1.198423 | .0274681      | 43.63 | 0.000 | 1.144587 | 1.25226  |
| D6 | DA             | .451687  | .0262365      | 17.22 | 0.000 | .4002643 | .5031096 |
|    | _cons          | 1.116315 | .0267977      | 41.66 | 0.000 | 1.063793 | 1.168838 |
| D7 | DA             | .4850119 | .0253704      | 19.12 | 0.000 | .4352869 | .5347369 |
|    | _cons          | 1.309397 | .0266232      | 49.18 | 0.000 | 1.257216 | 1.361577 |
| M1 | MA             | .2450332 | .032317       | 7.58  | 0.000 | .181693  | .3083734 |
|    | _cons          | .4735249 | .0265114      | 17.86 | 0.000 | .4215635 | .5254862 |
| M3 | MA             | .4358736 | .0406288      | 10.73 | 0.000 | .3562427 | .5155045 |
|    | _cons          | 1.557871 | .0336245      | 46.33 | 0.000 | 1.491969 | 1.623774 |
| M5 | MA             | .3174876 | .0349667      | 9.08  | 0.000 | .248954  | .3860211 |
|    | _cons          | 1.682033 | .0282872      | 59.46 | 0.000 | 1.626591 | 1.737475 |
| M6 | MA             | .564611  | .04103        | 13.76 | 0.000 | .4841937 | .6450282 |
|    | _cons          | 1.320031 | .0338208      | 39.03 | 0.000 | 1.253743 | 1.386318 |
| M7 | MA             | .2735698 | .0354087      | 7.73  | 0.000 | .2041701 | .3429696 |
|    | _cons          | 1.019152 | .028904       | 35.26 | 0.000 | .9625017 | 1.075803 |
| M8 | MA             | .316009  | .0367879      | 8.59  | 0.000 | .2439059 | .388112  |
|    | _cons          | .7539231 | .0304473      | 24.76 | 0.000 | .6942474 | .8135987 |
| M9 | MA             | .2944739 | .0392457      | 7.50  | 0.000 | .2175538 | .371394  |
|    | _cons          | .9448263 | .0322884      | 29.26 | 0.000 | .8815422 | 1.00811  |
|    | var(e.D1)      | .2772418 | .0159373      |       |       | .2477007 | .3103059 |
|    | var(e.D2)      | .2780465 | .0173755      |       |       | .2459942 | .3142752 |
|    | var(e.D3)      | .3153143 | .0194907      |       |       | .2793366 | .3559258 |
|    | var(e.D4)      | .2727252 | .0189302      |       |       | .2380359 | .31247   |
|    | var(e.D5)      | .1825767 | .0157442      |       |       | .1541854 | .2161959 |
|    | var(e.D6)      | .2771729 | .0181754      |       |       | .2437439 | .3151866 |
|    | var(e.D7)      | .2384281 | .0165656      |       |       | .2080738 | .2732106 |
|    | var(e.M1)      | .4103434 | .0244338      |       |       | .3651429 | .4611392 |
|    | var(e.M3)      | .5654357 | .0382852      |       |       | .495164  | .64568   |
|    | var(e.M5)      | .42057   | .0273808      |       |       | .3701873 | .4778097 |
|    | var(e.M6)      | .4454257 | .0397492      |       |       | .3739514 | .5305612 |
|    | var(e.M7)      | .4812024 | .0289572      |       |       | .4276665 | .5414399 |
|    | var(e.M8)      | .5214561 | .0318201      |       |       | .462675  | .587705  |
|    | var(e.M9)      | .6110143 | .0362391      |       |       | .5439599 | .6863346 |
|    | var(DA)        | 1        | (constrained) |       |       |          |          |
|    | var(MA)        | 1        | (constrained) |       |       |          |          |
|    | cov(e.D1,e.D2) | .1435695 | .0134754      | 10.65 | 0.000 | .1171583 | .1699808 |
|    | cov(e.D1,e.D3) | .0560801 | .0110049      | 5.10  | 0.000 | .0345109 | .0776494 |
|    | cov(e.D6,e.D7) | .1053647 | .0138636      | 7.60  | 0.000 | .0781926 | .1325367 |
|    | cov(e.M3,e.M5) | .1694005 | .0252511      | 6.71  | 0.000 | .1199093 | .2188918 |
|    | cov(DA,MA)     | .4027982 | .0478745      | 8.41  | 0.000 | .3089659 | .4966305 |

LR test of model vs. saturated:  $\chi^2(72) = 188.78$

Prob >  $\chi^2 = 0.0000$

**SEM model, standardized parameters**

```
sem (DA -> D1 D2 D3 D4 D5 D6 D7) ///
(MA -> M1 M3 M5 M6 M7 M8 M9), ///
covstruct(_lexogenous, diagonal) method(mlmv) latent(DA MA ) ///
cov( DA@1 DA*MA e.D1*e.D2 e.D1*e.D3 e.D6*e.D7 ///
MA@1 e.M3*e.M5) means( DA@0 MA@0) nocapslatent ///
standardized
```

Endogenous variables

Measurement: D1 D2 D3 D4 D5 D6 D7 M1 M3 M5 M6 M7 M8 M9

Exogenous variables

Latent: DA MA

Fitting saturated model:

```
Iteration 0: log likelihood = -9003.3706
Iteration 1: log likelihood = -8997.7694
Iteration 2: log likelihood = -8997.6553
Iteration 3: log likelihood = -8997.6552
```

Fitting baseline model:

```
Iteration 0: log likelihood = -10330.968
Iteration 1: log likelihood = -10330.943
Iteration 2: log likelihood = -10330.943
```

Fitting target model:

```
Iteration 0: log likelihood = -9400.7225 (not concave)
Iteration 1: log likelihood = -9245.5222 (not concave)
Iteration 2: log likelihood = -9156.9711
Iteration 3: log likelihood = -9105.7863
Iteration 4: log likelihood = -9092.2796
Iteration 5: log likelihood = -9092.0466
Iteration 6: log likelihood = -9092.0465
```

Structural equation model  
Estimation method: mlmv

Number of obs = 674

Log likelihood = -9092.0465

- ( 1) [ ]var(DA) = 1
- ( 2) [ ]var(MA) = 1

|              |       | OIM         |           |       |       |                      |          |
|--------------|-------|-------------|-----------|-------|-------|----------------------|----------|
| Standardized |       | Coefficient | std. err. | z     | P> z  | [95% conf. interval] |          |
| -----        |       |             |           |       |       |                      |          |
| Measurement  |       |             |           |       |       |                      |          |
| D1           | DA    | .5521314    | .0312781  | 17.65 | 0.000 | .4908275             | .6134354 |
|              | _cons | 1.463781    | .0552059  | 26.51 | 0.000 | 1.355579             | 1.571983 |
| -----        |       |             |           |       |       |                      |          |
| D2           | DA    | .5934796    | .0299261  | 19.83 | 0.000 | .5348255             | .6521338 |
|              | _cons | 1.242105    | .0513869  | 24.17 | 0.000 | 1.141389             | 1.342822 |
| -----        |       |             |           |       |       |                      |          |
| D3           | DA    | .5745415    | .0307952  | 18.66 | 0.000 | .514184              | .634899  |
|              | _cons | 2.227971    | .0722038  | 30.86 | 0.000 | 2.086454             | 2.369488 |
| -----        |       |             |           |       |       |                      |          |
| D4           | DA    | .7047577    | .0246295  | 28.61 | 0.000 | .6564848             | .7530306 |
|              | _cons | 1.898631    | .065287   | 29.08 | 0.000 | 1.770671             | 2.026592 |
| -----        |       |             |           |       |       |                      |          |
| D5           | DA    | .7978625    | .0206478  | 38.64 | 0.000 | .7573937             | .8383314 |
|              | _cons | 1.690788    | .060418   | 27.98 | 0.000 | 1.572371             | 1.809205 |
| -----        |       |             |           |       |       |                      |          |

|    |                |          |               |       |       |          |          |
|----|----------------|----------|---------------|-------|-------|----------|----------|
| D6 | DA             | .6511446 | .0274026      | 23.76 | 0.000 | .5974366 | .7048526 |
|    | _cons          | 1.609262 | .0584756      | 27.52 | 0.000 | 1.494652 | 1.723872 |
| D7 | DA             | .7047205 | .024738       | 28.49 | 0.000 | .6562349 | .7532061 |
|    | _cons          | 1.902549 | .0649566      | 29.29 | 0.000 | 1.775236 | 2.029861 |
| M1 | MA             | .3572715 | .0442704      | 8.07  | 0.000 | .270503  | .4440399 |
|    | _cons          | .6904246 | .0430247      | 16.05 | 0.000 | .6060977 | .7747515 |
| M3 | MA             | .5014942 | .0414454      | 12.10 | 0.000 | .4202626 | .5827257 |
|    | _cons          | 1.792408 | .0625061      | 28.68 | 0.000 | 1.669899 | 1.914918 |
| M5 | MA             | .4396979 | .0442702      | 9.93  | 0.000 | .3529299 | .5264659 |
|    | _cons          | 2.329497 | .0757595      | 30.75 | 0.000 | 2.181011 | 2.477983 |
| M6 | MA             | .6458662 | .0390259      | 16.55 | 0.000 | .5693768 | .7223556 |
|    | _cons          | 1.510001 | .0566647      | 26.65 | 0.000 | 1.398941 | 1.621062 |
| M7 | MA             | .3668716 | .0444832      | 8.25  | 0.000 | .2796861 | .454057  |
|    | _cons          | 1.366737 | .0538633      | 25.37 | 0.000 | 1.261167 | 1.472307 |
| M8 | MA             | .400906  | .0431015      | 9.30  | 0.000 | .3164285 | .4853835 |
|    | _cons          | .9564673 | .0466249      | 20.51 | 0.000 | .8650841 | 1.047851 |
| M9 | MA             | .3525359 | .0441984      | 7.98  | 0.000 | .2659086 | .4391632 |
|    | _cons          | 1.13112  | .0494899      | 22.86 | 0.000 | 1.034121 | 1.228118 |
|    | var(e.D1)      | .6951509 | .0345393      |       |       | .6306469 | .7662524 |
|    | var(e.D2)      | .6477819 | .0355211      |       |       | .5817726 | .7212809 |
|    | var(e.D3)      | .6699021 | .0353863      |       |       | .6040158 | .7429753 |
|    | var(e.D4)      | .5033166 | .0347156      |       |       | .4396739 | .5761716 |
|    | var(e.D5)      | .3634154 | .0329481      |       |       | .3042505 | .4340856 |
|    | var(e.D6)      | .5760107 | .0356861      |       |       | .510147  | .6503778 |
|    | var(e.D7)      | .503369  | .0348667      |       |       | .4394673 | .5765626 |
|    | var(e.M1)      | .8723571 | .0316331      |       |       | .8125092 | .9366132 |
|    | var(e.M3)      | .7485036 | .0415693      |       |       | .6713069 | .8345775 |
|    | var(e.M5)      | .8066657 | .038931       |       |       | .73386   | .8866945 |
|    | var(e.M6)      | .5828568 | .050411       |       |       | .4919736 | .690529  |
|    | var(e.M7)      | .8654052 | .0326392      |       |       | .8037408 | .9318007 |
|    | var(e.M8)      | .8392744 | .0345593      |       |       | .7742006 | .9098178 |
|    | var(e.M9)      | .8757184 | .0311631      |       |       | .8167213 | .9389773 |
|    | var(DA)        | 1        | (constrained) |       |       |          |          |
|    | var(MA)        | 1        | (constrained) |       |       |          |          |
|    | cov(e.D1,e.D2) | .5170997 | .0304622      | 16.98 | 0.000 | .457395  | .5768044 |
|    | cov(e.D1,e.D3) | .1896741 | .0349009      | 5.43  | 0.000 | .1212696 | .2580785 |
|    | cov(e.D6,e.D7) | .4098651 | .0380125      | 10.78 | 0.000 | .3353619 | .4843683 |
|    | cov(e.M3,e.M5) | .3473794 | .0401006      | 8.66  | 0.000 | .2687838 | .425975  |
|    | cov(DA,MA)     | .4027982 | .0478745      | 8.41  | 0.000 | .3089659 | .4966305 |

LR test of model vs. saturated:  $\chi^2(72) = 188.78$

Prob >  $\chi^2 = 0.0000$

**Appendix to:**

**Variation in attitudes toward diagnosis and medication of ADHD: a survey among clinicians in the Norwegian child and adolescent mental health services.** *Eur Child Adolesc Psychiatry*

Lyhmann, I; Widding-Havneraas, T; Zachrisson, HD; Bjelland, I; Chaulagain, A; Mykletun, A; Halmøy, A.

**Corresponding author:** Ingvild Lyhmann, [ingvild.lyhmann@helse-bergen.no](mailto:ingvild.lyhmann@helse-bergen.no)

Affiliations: Centre for Research and Education in Forensic Psychiatry, Haukeland University Hospital, Bergen, Norway; Department of Clinical Medicine, University of Bergen, Bergen, Norway
